# Supplementary material for: H3K4 monomethylation dictates nucleosome dynamics and chromatin remodeling at stress-responsive genes
Source: Oxford University Press journal article supplement (doi:10.1093/nar/gkv220), 2015-03-26

## SUPPLEMENTARY MATERIAL

### Supplementary Tables

**Table 1: Yeast strains used in this study**

| Strain Name |                                               | Genotype                                                                                                                                |
|-------------|-----------------------------------------------|-----------------------------------------------------------------------------------------------------------------------------------------|
| W303-1A     | W303-1A                                       | <i>MATa ade2-1 ura3-1 leu2-3,112 trp1-1 his3-11,15 can1-100</i>                                                                         |
|             | <i>rsc9<sup>fs</sup> (*)</i>                  | <i>fae1-2::TRP1</i> (isogenic to W303-1A)                                                                                               |
| YEN405      | <i>set1</i>                                   | <i>SET1::KanMx4</i> (isogenic to W303-1A)                                                                                               |
| YGM108      | <i>rsc9<sup>fs</sup> set1</i>                 | <i>rsc9<sup>fs</sup> SET1::NatMx</i> (isogenic to W303-1A)                                                                              |
| YGM99       | <i>rsc9<sup>fs</sup> set2</i>                 | <i>rsc9<sup>fs</sup> SET2::KanMx4</i> (isogenic to W303-1A)                                                                             |
| YSL151      | <i>H3K4A (**)</i>                             | <i>MATa his3Δ200 leu2Δ1 ura3-5 trp1Δ63 lys2-1285 (hht1-hhf1Δ)::LEU2 (hht2-hhf2Δ)::HIS3 TRP1-plasm (HHT2-HHF2)</i>                       |
| YGM208      | <i>H3K4A rsc9ts</i>                           | <i>MATa his3Δ200 leu2Δ1 ura3-5 trp1Δ63 lys2-1285 (hht1-hhf1Δ)::LEU2 (hht2-hhf2Δ)::HIS3 TRP1-plasm (HHT2-HHF2) rsc9-G489STOP::KanMx4</i> |
| YEN354      | <i>rsc9<sup>fs</sup> swd1</i>                 | <i>rsc9<sup>fs</sup> SWD1::KanMx4</i> (isogenic to W303-1A)                                                                             |
| YEN372      | <i>rsc9<sup>fs</sup> bre2</i>                 | <i>rsc9<sup>fs</sup> BRE2::KanMx4</i> (isogenic to W303-1A)                                                                             |
| YEN363      | <i>rsc9<sup>fs</sup> sdc1</i>                 | <i>rsc9<sup>fs</sup> SDC1::KanMx4</i> (isogenic to W303-1A)                                                                             |
| YGM267      | <i>rsc9<sup>fs</sup> spp1</i>                 | <i>rsc9<sup>fs</sup> SPP1::KanMx4</i> (isogenic to W303-1A)                                                                             |
| YEN436      | <i>rsc9<sup>fs</sup> set1 isw1</i>            | <i>rsc9<sup>fs</sup> SET1::NatMx ISW1::KanMx4</i> (isogenic to W303-1A)                                                                 |
| YEN455      | <i>rsc9<sup>fs</sup> set1 eaf7</i>            | <i>rsc9<sup>fs</sup> SET1::NatMx EAF7::KanMx4</i> (isogenic to W303-1A)                                                                 |
| YMN164      | <i>rsc9<sup>fs</sup> set1 snf2</i>            | <i>rsc9<sup>fs</sup> SET1::NatMx SNF2::HPH</i> (isogenic to W303-1A)                                                                    |
| YMN206      | <i>rsc9<sup>fs</sup> set1 bdf1</i>            | <i>rsc9<sup>fs</sup> SET1::NatMx BDF1::KanMx4</i> (isogenic to W303-1A)                                                                 |
| YMN225      | <i>Bdf1-6HA</i>                               | <i>BDF1-6HA-HIS3</i> (isogenic to W303-1A)                                                                                              |
| YMN226      | <i>set1 Bdf1-6HA</i>                          | <i>SET1::NatMx BDF1-6HA-HIS3</i> (isogenic to W303-1A)                                                                                  |
| YMN227      | <i>rsc9<sup>fs</sup> Bdf1-6HA</i>             | <i>rsc9<sup>fs</sup> BDF1-6HA-HIS3</i> (isogenic to W303-1A)                                                                            |
| YMN228      | <i>rsc9<sup>fs</sup> set1 Bdf1-6HA</i>        | <i>rsc9<sup>fs</sup> SET1::NatMx BDF1-6HA-HIS3</i> (isogenic to W303-1A)                                                                |
| YMN208      | <i>rsc9<sup>fs</sup> set1 htz1</i>            | <i>rsc9<sup>fs</sup> SET1::NatMx HTZ1::KanMx4</i> (isogenic to W303-1A)                                                                 |
| YMN219      | <i>rsc9<sup>fs</sup> set1 pGAL-Swr1 ADGEV</i> | <i>rsc9<sup>fs</sup> SET1::NatMx KAN::pGAL1-SWR1 Gal4DBD-hER- VP16::URA3</i> (isogenic to W303-1A)                                      |
| Euroscarf   | <i>rsc9degron</i>                             | <i>MATa his3-11,15 leu2-3,112 trp1-11 ura3-1 Δlys2::rKWD50N, pGAL1-10-myc::UBR1::HIS3 pCUP1-degron::RSC9::URA3</i>                      |
| YGM185      | <i>rsc9degron set1</i>                        | <i>MATa his3-11,15 leu2-3,112 trp1-11 ura3-1 Δlys2::rKWD50N, pGAL1-10-myc::UBR1::HIS3 pCUP1-degron::RSC9::URA3 SET1::kanMx4</i>         |
| YAL74       | <i>rp3</i>                                    | <i>RPD3::KanMx4</i> (isogenic to W303-1A)                                                                                               |
| YGM277      | <i>rp3 set1</i>                               | <i>RPD3::KanMx4 SET1::NatMx</i> (isogenic to W303-1A)                                                                                   |
| BY4741      | wild type                                     | <i>MATa his3-Δ1 leu2-Δ0 met15-Δ0 ura3-Δ0</i>                                                                                            |
| Euroscarf   | <i>spt20</i>                                  | <i>SPT20::KanMx4</i> (isogenic to BY4741)                                                                                               |
| YGM61       | <i>hog1</i>                                   | <i>HOG1::KanMx4</i> (isogenic to BY4741)                                                                                                |
| YGM283      | <i>spt20 set1</i>                             | <i>SET1::NatMx SPT20::kanMx4</i> (isogenic to BY4741)                                                                                   |
| YGM222      | <i>Set1-HA</i>                                | <i>SET1-6HA-HIS3</i> (isogenic to BY4741)                                                                                               |

(\*) *fae1-2::TRP1* is a nonsense mutation at Gln489 of *RSC9*.

(\*\*) Gift from T. Kouzarides.

**Table 2: Oligonucleotides used in this study**

| Amplicon                    | Position (*) | Forward sequence (5' to 3')    | Reverse sequence (5' to 3')      |
|-----------------------------|--------------|--------------------------------|----------------------------------|
| <b>Northern blot probes</b> |              |                                |                                  |
| <i>STL1</i>                 | +402/+1280   | GGCCAGTTTATCATCGGAAG           | GCGTTTGTGATGCACGAAC              |
| <i>CTT1</i>                 | +1/+1722     | CGGGATCCATGCCAATAAGATCAATC     | GGGGATCCTTAATTGGCACTTGCAATGGAC   |
| <i>ACT1</i>                 | -389 / +30   | TGTCACCCGGCCTCTATTTT           | GTGCAAGCGCTAGAACATAC             |
| <i>RDN18</i>                | +1/+1000     | TATCTGGTTGATCCTGCCAG           | GATCATCTTCGATCCCTAA              |
| <i>ENO1</i>                 | +1/+1310     | ATGGCTGTCTCTAAAGTTTA           | AATTTGTCACCGTGGTGGAA             |
| <b>ChIP assays</b>          |              |                                |                                  |
| stl1 1/2 prom               | -372 / -112  | TTGGTTAATCCTCGCCAGGT           | TATGAGTGTGACTACTCCTG             |
| stl1 III a/b ORF            | +402 / +630  | GGCCAGTTTATCATCGGAAG           | GATTTGCATTGACACGGGGA             |
| ctt1 3/4 prom               | -452 / -160  | AGGCACATGGGGATAGAACC           | GGGAGTCGGGGCATTATCG              |
| ctt1 II a/b ORF             | +422 / +669  | GAACCATGACTGGGTCTTCA           | GAAGGAATGACCAGAGTACG             |
| tel rt a/b                  | 269437-637   | ACCACTCAAAGAGAAATTTACTGGAAGA   | CTCGTTAGGATCACGTTTCAATC          |
| tel2 a/b                    | 269493-982   | AGTGCAAGCGTAACAAAGCC           | GCCTCACTGGTTTTTACCCT             |
| GAL1-10 prom                | -537 / -215  | AGAGCCCCATTATCTTAGCC           | CGCATTATCATCCTATGGTTG            |
| <b>MNase assay</b>          |              |                                |                                  |
| -583,5_stl1                 | -635/-534    | ACTTTGACTCAACTTGCCTCATTT       | AAATGCAGGTAGCGGAGGC              |
| -498,5_stl1                 | -552/-447    | GCCTCCGCTACCTGCATTT            | TCCGCTATTTTAGTTTATGCAAC          |
| -415_stl1                   | -468/-364    | GCATGAACTAAATAAGCGGAAAG        | ATTAACCAACCAAAACCGTATATAGC       |
| -326_stl1                   | -384/-271    | TACCGTTTTTGGTTGGTTAATCCTCGC    | GTGAACCAAAAGTGTTTCCCTTACCGG      |
| -255_stl1                   | -309/-203    | AAAGTGCAGATCCCGGTAAGG          | TAAGCTTTCTCAATTTCTCTATCTACTTCT   |
| -170_stl1                   | -221/-121    | GAGAAATTGAGAAAGCTTAAGTGAGATG   | TGACTACTCCTGAAGTGAATTTCTG        |
| -96_stl1                    | -157/-44     | GCCTTAGAGGGTCAGAAATGCAGTT      | TCTAACTTGATGCTAGAACACGTATACA     |
| -5,5_stl1                   | -61/+49      | TCTAGCATACAAGTTAGAATAAATAAAAAA | TTCTGCTTATAAATTTGCCTTTGAA        |
| 74_stl1                     | +24/+124     | TTTCAAAGGCAAATTTATAAGCAGAA     | ACAGGGAGAAGCCCGTCATA             |
| 158,5_stl1                  | +96/+219     | TATCGCATCTATGACGGGCTTCTCC      | TCTGTCATGATCGCCATTTTCTTTG        |
| 247_stl1                    | +197/+297    | AAGAAAATGGCGATCATGACAGA        | GAACATAACGAATAGAGAACCTGCG        |
| 330,5_stl1                  | +280/+381    | TCTCTATTCTGTTATGTTCTGCGGT      | TGCGCATGTAGAAATAACGGC            |
| 405_stl1                    | +354/+456    | CATTGGTGCCGTTATTTCTACA         | TGTATTCAACCCTGTTCCAACA           |
| 487_stl1                    | +436/+537    | GTTGGAACAGGGTTGAATACATCTAC     | AATTGTGGAACCTTCTAAATTGACC        |
| 562,5_stl1                  | +512/+614    | TGGTCAATTTAGAAGGTTCCACAA       | GGGAATCTCCACTGAACAGAACTG         |
| 647,5_stl1                  | +594/+703    | TTCTGTTCACTGGAGATTCCCC         | GACTTTGAGAAATCAGCCAACGT          |
| 739_stl1                    | +683/+796    | GTTGGCTGATTTCTCAAAGT           | CATCGTGAAGCATAGCAACT             |
| 830,5_stl1                  | +780/+883    | TGCTATGCTTCACGATGCTGT          | CAATCAAAGCCCTCTGAAGATTTT         |
| 902,5_stl1                  | +851/+956    | GCAGGTCCCAAAATCTTCAGAG         | TTGAATAATACAGTAGAGTAGTATATGGCAGC |

(\*) Position indicates the distance of the 5' end from the respective ATG initiation codon.

## Supplementary Figure Legends

### Figure S1. Specificity of *SET1* deletion effects for osmostress-responsive gene expression.

(A) Deletion of *SET1* restores gene expression in response to osmostress in an *rsc9* decon strain. Wild-type and *rsc9* decon and *rsc9* decon *set1* mutant strains were grown in YPGal at 25 °C, shifted to 37 °C for 2 h and then subjected to osmostress (0.4 M NaCl) for the indicated times. RNA was probed for analysis of *STL1*, *CTT1* and *ACT1* (as a loading control) expression.

(B) Sensitivity to caffeine that is associated with RSC mutants is not suppressed by deletion of *SET1*. Wild type and the indicated mutant strains were spotted on plates without and with 5 mM caffeine. Growth was scored after 4 days.

(C) The transcriptional defect of the *rsc9<sup>ts</sup>* strain after heat stress is not restored by deletion of *SET1*. The indicated strains were grown in YPD at 25 °C up to OD<sub>660</sub> 0.5, were shifted to 37 °C for 2 hours and were then subjected to heat shock at 42 °C for the indicated times. RNA was probed for analysis of *CTT1* and *ACT1* (as a loading control) expression.

### Figure S2. Role of H3K4 methylation in osmostress gene expression.

(A) Deletion of *SET1* does not suppress the transcriptional defect of *rpd3Δ* and *spt20Δ* mutant strains. The indicated strains were grown in YPD until mid-log phase and were then subjected to osmostress (0.4 M NaCl) for the indicated times. Total RNA was assayed by northern blot for *CTT1* and *ACT1* (as a loading control) expression.

(B) Cells deficient in H3K4 trimethylation express stress-genes in a similar manner to wild type. mRNA was obtained from wild type and mutant strains (*hog1Δ*, *set1Δ* and H3K4A strains) that were untreated or treated with a mild osmotic shock (0.4 M NaCl) for the indicated times. Total RNA was assayed by Northern blot for *STL1*, *CTT1* and *ACT1* (as a loading control) expression.

### Figure S3. The levels of H3K4 trimethylation at the *STL1* promoter under basal conditions are similar to those observed at the *GAL10* promoter after galactose induction.

Wild type and *set1Δ* strains were grown in YP with either raffinose 2% or glucose 2%, and galactose 2% was then added to the cultures growing in raffinose. At mid-log phase samples were taken for ChIP analysis of the levels of trimethyl H3K4 (using the Abcam antibody) at the promoters of *GAL10* and *STL1*. As a control, chromatin from the wild type and *set1Δ* cells was immunoprecipitated without antibody (no Ab). PCR samples were amplified with *TEL* as a loading control (upper band). Quantification of the bands is shown at the bottom.

### Figure S4. Histones are not evicted from the stress-responsive locus upon stress in an *rsc9<sup>ts</sup>* mutant.

Cells were grown at 25 °C and shifted to non-permissive temperature (37°C) for 2 hours. Histone H3 occupancy of the *STL1* ORF in wild type and *rsc9<sup>ts</sup>* mutant cells untreated or treated

with a mild osmotic shock (0.4 M NaCl) at the indicated times was analyzed using ChIP assay followed by real time PCR. Histone H3 occupancy was normalized to that of a telomere control and H3 levels of untreated samples were set to one as a reference of each strain. Data represent the mean and standard deviation of three independent experiments.

**Figure S5. The deletion of *SET1* does not change Bdf1 recruitment at *STL1* in the absence of stress.**

Association of Bdf1-6HA with the promoter and ORF of *STL1* was analyzed in the indicated strains in the absence of stress using ChIP assays. The real-time PCR results are shown as fold induction of untreated wild type cells relative to *set1*, *rsc9<sup>ts</sup>* and *set1 rsc9<sup>ts</sup>* mutant cells. Data are means and standard deviation of three independent experiments.

A

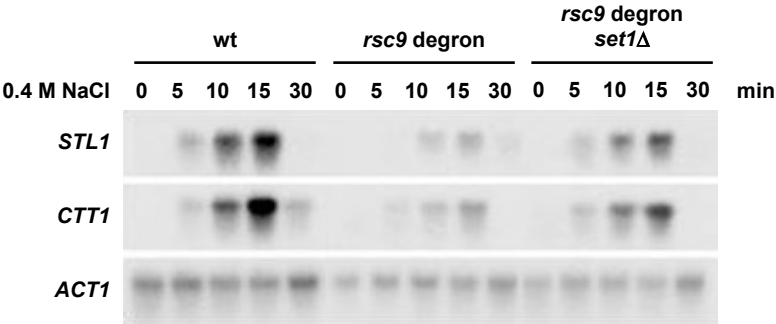

B

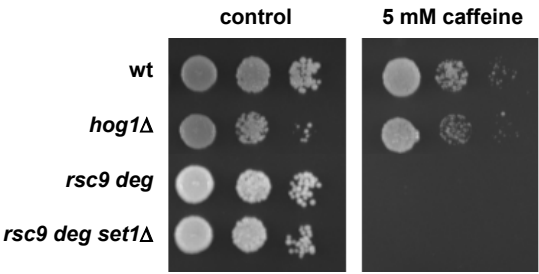

C

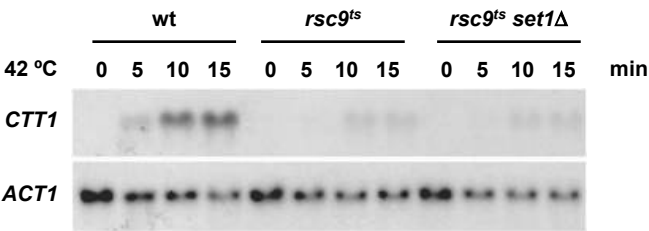

**A**

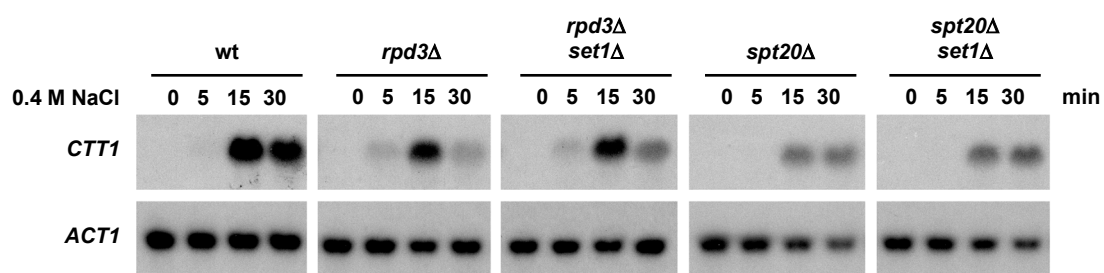

# B

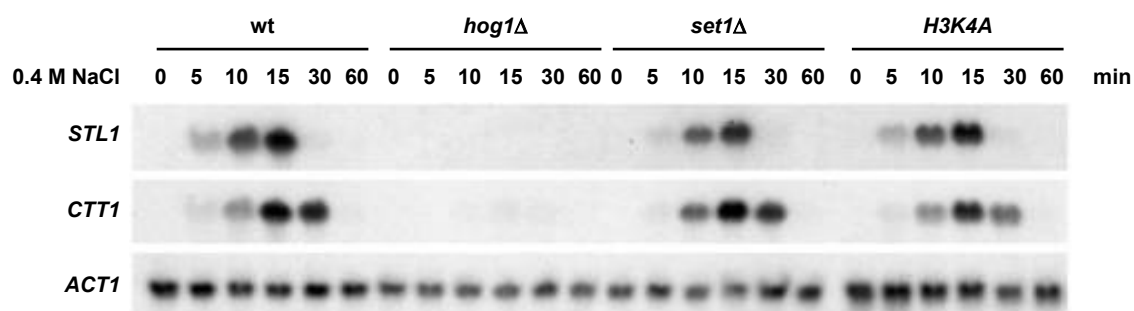

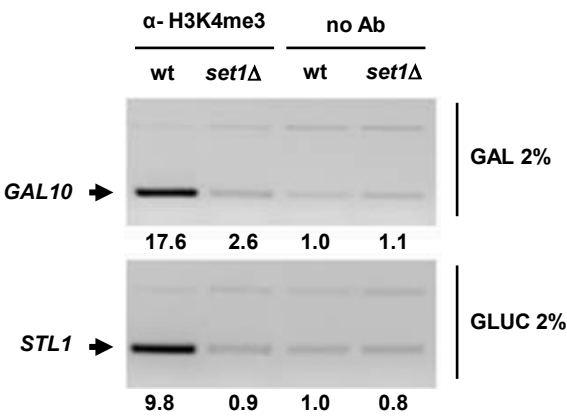

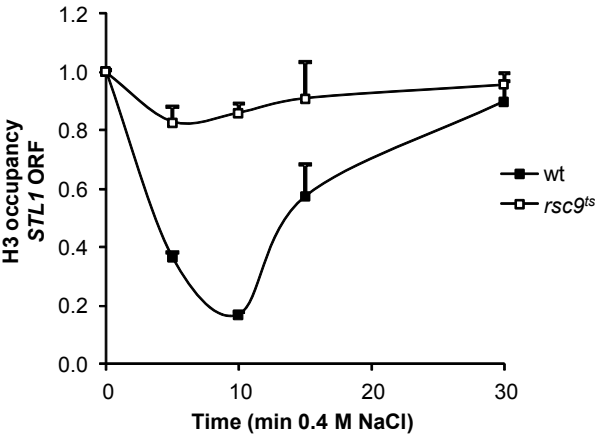



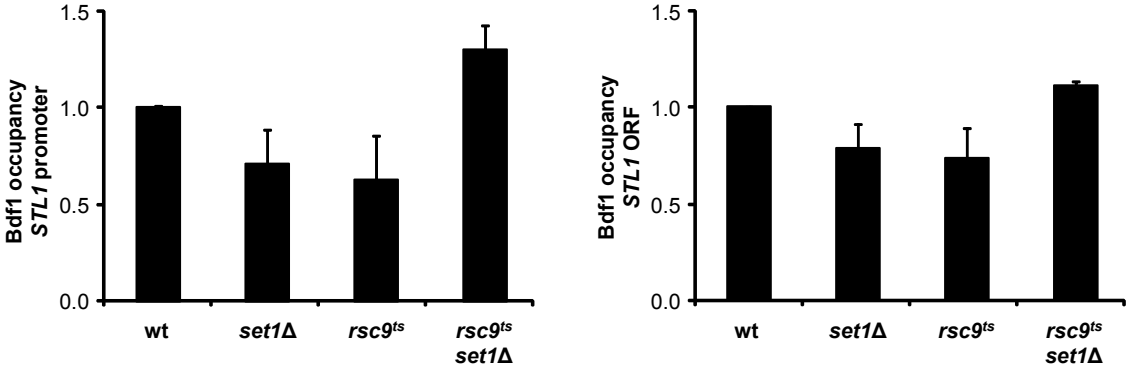

Supplement: gkv220_supplementary_data.zip [file gkv220_supplementary_data.zip]
